# Supplementary material for: Extracellular vesicles are rapidly purified from human plasma by PRotein Organic Solvent PRecipitation (PROSPR)
Source: PubMed Central journal article supplement (PMC4588595; doi:10.1038/srep14664), 2015-09-30
Supplement: srep14664-s1.pdf [file srep14664-s1.pdf]

# Extracellular vesicles are rapidly purified from human plasma by Protein Organic Solvent PREcipitation (PROSPR)

Xavier Gallart-Palau, Aida Serra, Andrew See Weng Wong, Sara Sandin, Mitchell K.P. Lai, Christopher P. Chen, Oi Lian Kon, Siu Kwan Sze

**a**

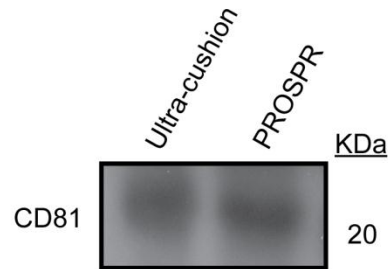

**b**

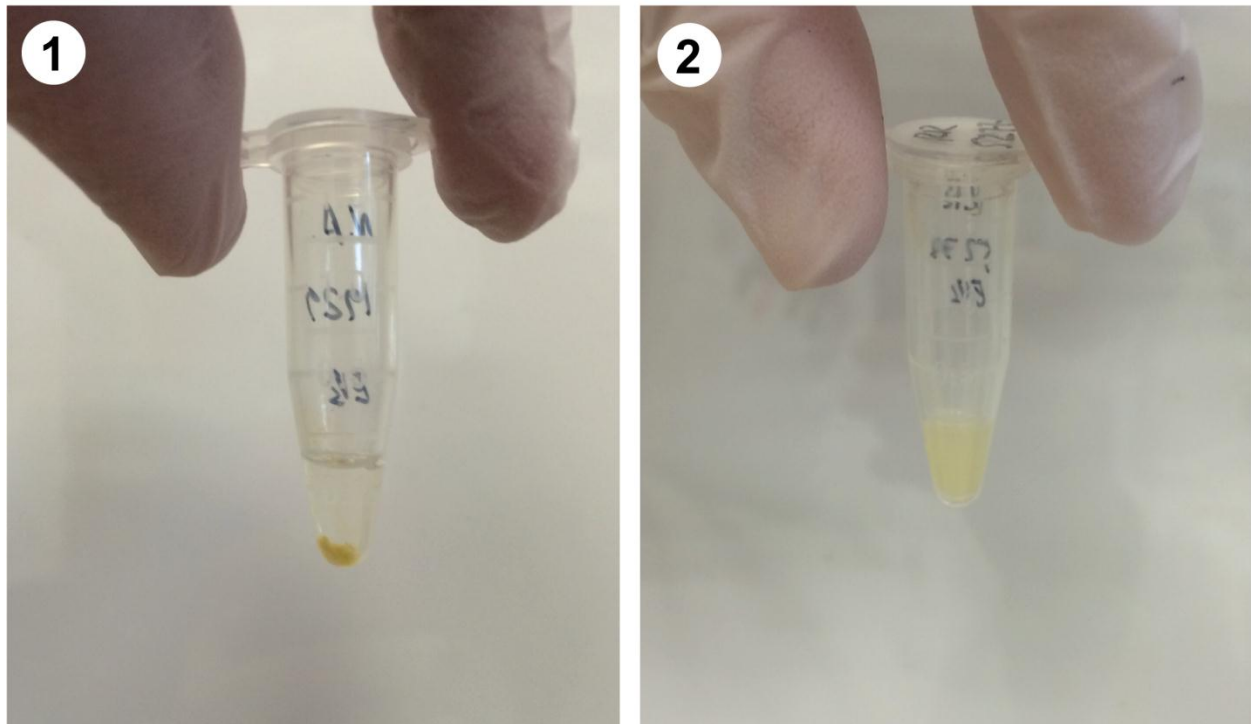

**Supplementary Figure 1: (a)** Western blot showing the presence of CD81 in plasma EVs isolated by ultra-cushion and PROSPR methods. **(b1)** The pellet containing separated EVs after vacuum evaporation of PROSPR supernatant is shown after addition of bi-distilled water. **(b2)** PROSPR EVs pellet resuspended in bi-distilled water.
