# Supplementary material for: Extracellular vesicles are rapidly purified from human plasma by PRotein Organic Solvent PRecipitation (PROSPR)
Source: PubMed Central journal article supplement (PMC4588595; doi:10.1038/srep14664), 2015-09-30
Supplement: srep14664-s2.pdf [file srep14664-s2.pdf]

# Extracellular vesicles are rapidly purified from human plasma by Protein

## Organic Solvent Precipitation (PROSPR)

Xavier Gallart-Palau, Aida Serra, Andrew See Weng Wong, Sara Sandin, Mitchell K.P. Lai, Christopher P. Chen, Oi Lian Kon, Siu Kwan Sze

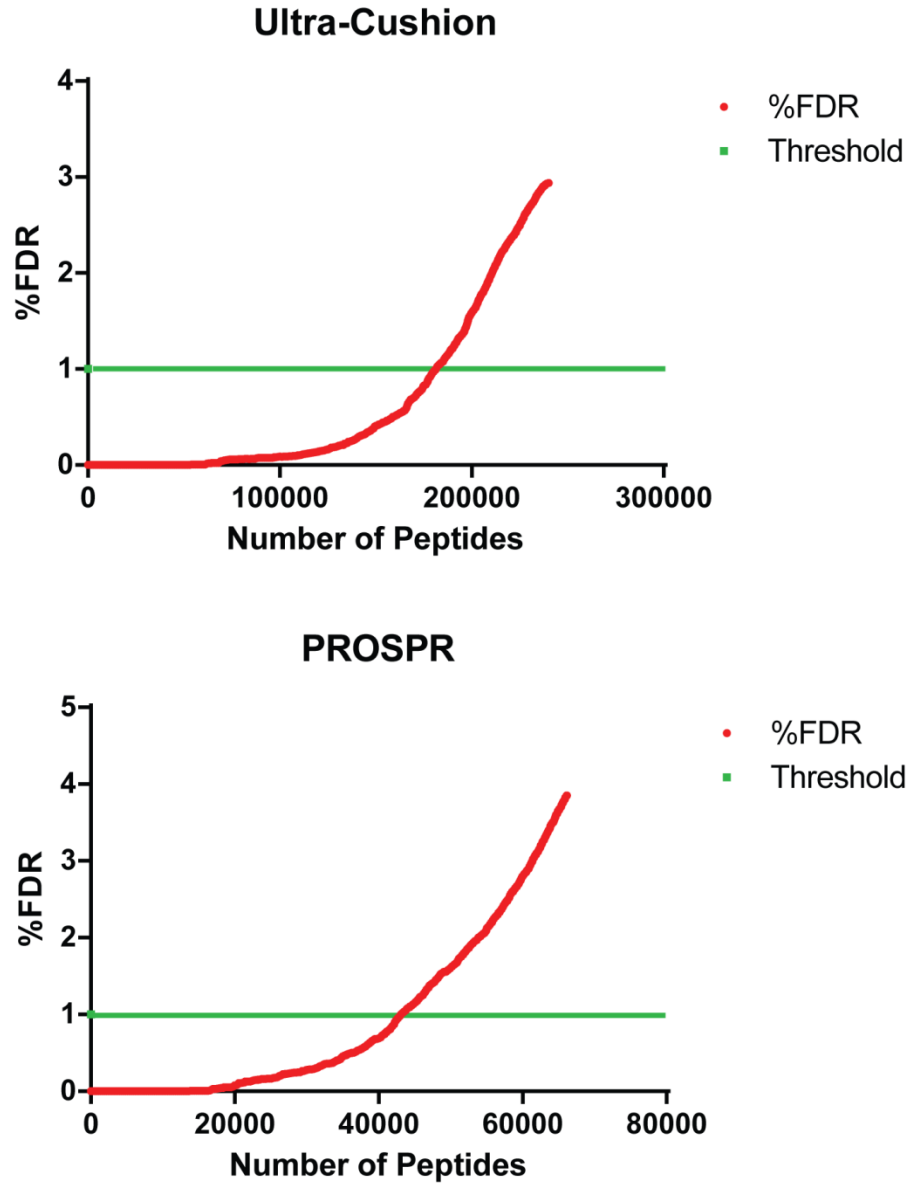

**Supplementary Figure 2:** FDR distribution of peptides identified by Ultra-cushion and PROSPR.
